# Supplementary material for: Methylmalonic acid promotes colorectal cancer progression via activation of Wnt/β-catenin pathway mediated epithelial–mesenchymal transition
Source: Cancer Cell Int. 2023 Jul 5;23:131. doi: 10.1186/s12935-023-02973-z (PMC10320877; doi:10.1186/s12935-023-02973-z)
Supplement: Supplementary file 2 — Additional file 2: Table S3. Differentially expressed genes of HCT116 cells treated with vehicle and 5mM MMA for 10 days. [file 12935_2023_2973_MOESM2_ESM.xlsx]

## Sheet: Sheet1
pathway_id	pathway_name	pvalue	Gene_ID	Gene_name	KO_ENTRY	EC	Description	FPKM.HCT_MMA	FPKM.HCT_con	fc	log2(fc)	regulation
ko05200	Pathways in cancer	0.00429712	ENSG00000074047	GLI2	K16798	NA	GLI family zinc finger 2 [Source:HGNC Symbol;Acc:HGNC:4318]	0.589243	0.277217	2.12556	1.08785	up
ko05200	Pathways in cancer	0.00429712	ENSG00000100784	RPS6KA5	NA	NA	ribosomal protein S6 kinase A5 [Source:HGNC Symbol;Acc:HGNC:10434]	0.0991835	0.0402504	2.46416	1.3011	up
ko05200	Pathways in cancer	0.00429712	ENSG00000104290	FZD3	NA	NA	frizzled class receptor 3 [Source:HGNC Symbol;Acc:HGNC:4041]	0.372492	0.171425	2.17292	1.11964	up
ko05200	Pathways in cancer	0.00429712	ENSG00000110395	CBL	NA	NA	Cbl proto-oncogene [Source:HGNC Symbol;Acc:HGNC:1541]	0.536376	1.51059	0.355078	-1.49379	down
ko05200	Pathways in cancer	0.00429712	ENSG00000134954	ETS1	K02678	NA	ETS proto-oncogene 1, transcription factor [Source:HGNC Symbol;Acc:HGNC:3488]	0.661024	0.293537	2.25192	1.17116	up
ko05200	Pathways in cancer	0.00429712	ENSG00000138685	FGF2	K18497	NA	fibroblast growth factor 2 [Source:HGNC Symbol;Acc:HGNC:3676]	0.439874	0.19841	2.21699	1.1486	up
ko05200	Pathways in cancer	0.00429712	ENSG00000139618	BRCA2	NA	NA	BRCA2 DNA repair associated [Source:HGNC Symbol;Acc:HGNC:1101]	0.184376	0.0841413	2.19127	1.13176	up
ko05200	Pathways in cancer	0.00429712	ENSG00000150907	FOXO1	NA	NA	forkhead box O1 [Source:HGNC Symbol;Acc:HGNC:3819]	0.928548	0.388822	2.38811	1.25587	up
ko05200	Pathways in cancer	0.00429712	ENSG00000154229	PRKCA	NA	NA	protein kinase C alpha [Source:HGNC Symbol;Acc:HGNC:9393]	0.750535	0.34123	2.1995	1.13717	up
ko05200	Pathways in cancer	0.00429712	ENSG00000174804	FZD4	K02354	NA	frizzled class receptor 4 [Source:HGNC Symbol;Acc:HGNC:4042]	0.453807	0.224919	2.01765	1.01267	up
ko05200	Pathways in cancer	0.00429712	ENSG00000198121	LPAR1	K04289	NA	lysophosphatidic acid receptor 1 [Source:HGNC Symbol;Acc:HGNC:3166]	0.688944	0.306452	2.24813	1.16873	up
ko04540	Gap junction	0.00638204	ENSG00000123104	ITPR2	K04959	NA	inositol 1,4,5-trisphosphate receptor type 2 [Source:HGNC Symbol;Acc:HGNC:6181]	0.26475	0.0944798	2.80219	1.48655	up
ko04540	Gap junction	0.00638204	ENSG00000145431	PDGFC	K05450	NA	platelet derived growth factor C [Source:HGNC Symbol;Acc:HGNC:8801]	0.520935	0.152676	3.41204	1.77064	up
ko04540	Gap junction	0.00638204	ENSG00000154229	PRKCA	NA	NA	protein kinase C alpha [Source:HGNC Symbol;Acc:HGNC:9393]	0.750535	0.34123	2.1995	1.13717	up
ko04540	Gap junction	0.00638204	ENSG00000198121	LPAR1	K04289	NA	lysophosphatidic acid receptor 1 [Source:HGNC Symbol;Acc:HGNC:3166]	0.688944	0.306452	2.24813	1.16873	up
ko05205	Proteoglycans in cancer	0.00829962	ENSG00000104290	FZD3	NA	NA	frizzled class receptor 3 [Source:HGNC Symbol;Acc:HGNC:4041]	0.372492	0.171425	2.17292	1.11964	up
ko05205	Proteoglycans in cancer	0.00829962	ENSG00000110395	CBL	NA	NA	Cbl proto-oncogene [Source:HGNC Symbol;Acc:HGNC:1541]	0.536376	1.51059	0.355078	-1.49379	down
ko05205	Proteoglycans in cancer	0.00829962	ENSG00000123104	ITPR2	K04959	NA	inositol 1,4,5-trisphosphate receptor type 2 [Source:HGNC Symbol;Acc:HGNC:6181]	0.26475	0.0944798	2.80219	1.48655	up
ko05205	Proteoglycans in cancer	0.00829962	ENSG00000138685	FGF2	K18497	NA	fibroblast growth factor 2 [Source:HGNC Symbol;Acc:HGNC:3676]	0.439874	0.19841	2.21699	1.1486	up
ko05205	Proteoglycans in cancer	0.00829962	ENSG00000154229	PRKCA	NA	NA	protein kinase C alpha [Source:HGNC Symbol;Acc:HGNC:9393]	0.750535	0.34123	2.1995	1.13717	up
ko05205	Proteoglycans in cancer	0.00829962	ENSG00000174804	FZD4	K02354	NA	frizzled class receptor 4 [Source:HGNC Symbol;Acc:HGNC:4042]	0.453807	0.224919	2.01765	1.01267	up
ko00100	Steroid biosynthesis	0.0128949	ENSG00000019186	CYP24A1	K07436	EC:1.14.15.16	cytochrome P450 family 24 subfamily A member 1 [Source:HGNC Symbol;Acc:HGNC:2602]	6.27018	2.04677	3.06344	1.61515	up
ko00100	Steroid biosynthesis	0.0128949	ENSG00000057252	SOAT1	NA	NA	sterol O-acyltransferase 1 [Source:HGNC Symbol;Acc:HGNC:11177]	2.00934	0.926621	2.16845	1.11667	up
ko00340	Histidine metabolism	0.0156505	ENSG00000156017	CARNMT1	K19787	EC:2.1.1.22	carnosine N-methyltransferase 1 [Source:HGNC Symbol;Acc:HGNC:23435]	1.46308	0.686265	2.13194	1.09217	up
ko00340	Histidine metabolism	0.0156505	ENSG00000184254	ALDH1A3	NA	NA	aldehyde dehydrogenase 1 family member A3 [Source:HGNC Symbol;Acc:HGNC:409]	25.7195	11.4709	2.24215	1.16488	up
ko00515	Mannose type O-glycan biosynthesis	0.0186346	ENSG00000106692	FKTN	NA	NA	fukutin [Source:HGNC Symbol;Acc:HGNC:3622]	0.161559	0.0792648	2.03822	1.02731	up
ko00515	Mannose type O-glycan biosynthesis	0.0186346	ENSG00000181027	FKRP	K19873	EC:2.7.8.-	fukutin related protein [Source:HGNC Symbol;Acc:HGNC:17997]	2.48819	0.555175	4.48181	2.16408	up
ko05217	Basal cell carcinoma	0.0191194	ENSG00000074047	GLI2	K16798	NA	GLI family zinc finger 2 [Source:HGNC Symbol;Acc:HGNC:4318]	0.589243	0.277217	2.12556	1.08785	up
ko05217	Basal cell carcinoma	0.0191194	ENSG00000104290	FZD3	NA	NA	frizzled class receptor 3 [Source:HGNC Symbol;Acc:HGNC:4041]	0.372492	0.171425	2.17292	1.11964	up
ko05217	Basal cell carcinoma	0.0191194	ENSG00000174804	FZD4	K02354	NA	frizzled class receptor 4 [Source:HGNC Symbol;Acc:HGNC:4042]	0.453807	0.224919	2.01765	1.01267	up
ko04144	Endocytosis	0.021949	ENSG00000066777	ARFGEF1	K18442	NA	ADP ribosylation factor guanine nucleotide exchange factor 1 [Source:HGNC Symbol;Acc:HGNC:15772]	0.616867	0.302207	2.04121	1.02942	up
ko04144	Endocytosis	0.021949	ENSG00000070371	CLTCL1	K04646	NA	clathrin heavy chain like 1 [Source:HGNC Symbol;Acc:HGNC:2093]	0.373407	0.177301	2.10606	1.07454	up
ko04144	Endocytosis	0.021949	ENSG00000078747	ITCH	K05632	EC:2.3.2.26	itchy E3 ubiquitin protein ligase [Source:HGNC Symbol;Acc:HGNC:13890]	1.44857	0.659968	2.19491	1.13416	up
ko04144	Endocytosis	0.021949	ENSG00000102189	EEA1	K12478	NA	early endosome antigen 1 [Source:HGNC Symbol;Acc:HGNC:3185]	0.367502	0.110101	3.33786	1.73893	up
ko04144	Endocytosis	0.021949	ENSG00000110395	CBL	NA	NA	Cbl proto-oncogene [Source:HGNC Symbol;Acc:HGNC:1541]	0.536376	1.51059	0.355078	-1.49379	down
ko04144	Endocytosis	0.021949	ENSG00000164695	CHMP4C	K12194	NA	charged multivesicular body protein 4C [Source:HGNC Symbol;Acc:HGNC:30599]	2.45697	1.13363	2.16734	1.11593	up
ko00512	Mucin type O-glycan biosynthesis	0.0288696	ENSG00000106392	C1GALT1	K00731	EC:2.4.1.122	core 1 synthase, glycoprotein-N-acetylgalactosamine 3-beta-galactosyltransferase 1 [Source:HGNC Symbol;Acc:HGNC:24337]	0.767947	0.347241	2.21157	1.14507	up
ko00512	Mucin type O-glycan biosynthesis	0.0288696	ENSG00000257594	GALNT4	K00710	EC:2.4.1.41	polypeptide N-acetylgalactosaminyltransferase 4 [Source:HGNC Symbol;Acc:HGNC:4126]	0.475908	0.175611	2.71001	1.4383	up
ko05206	MicroRNAs in cancer	0.0323927	ENSG00000019186	CYP24A1	K07436	EC:1.14.15.16	cytochrome P450 family 24 subfamily A member 1 [Source:HGNC Symbol;Acc:HGNC:2602]	6.27018	2.04677	3.06344	1.61515	up
ko05206	MicroRNAs in cancer	0.0323927	ENSG00000100784	RPS6KA5	NA	NA	ribosomal protein S6 kinase A5 [Source:HGNC Symbol;Acc:HGNC:10434]	0.0991835	0.0402504	2.46416	1.3011	up
ko05206	MicroRNAs in cancer	0.0323927	ENSG00000104290	FZD3	NA	NA	frizzled class receptor 3 [Source:HGNC Symbol;Acc:HGNC:4041]	0.372492	0.171425	2.17292	1.11964	up
ko05206	MicroRNAs in cancer	0.0323927	ENSG00000136158	SPRY2	K17383	NA	sprouty RTK signaling antagonist 2 [Source:HGNC Symbol;Acc:HGNC:11270]	0.890183	0.403751	2.20478	1.14064	up
ko05206	MicroRNAs in cancer	0.0323927	ENSG00000154229	PRKCA	NA	NA	protein kinase C alpha [Source:HGNC Symbol;Acc:HGNC:9393]	0.750535	0.34123	2.1995	1.13717	up
ko01521	EGFR tyrosine kinase inhibitor resistance	0.0335759	ENSG00000138685	FGF2	K18497	NA	fibroblast growth factor 2 [Source:HGNC Symbol;Acc:HGNC:3676]	0.439874	0.19841	2.21699	1.1486	up
ko01521	EGFR tyrosine kinase inhibitor resistance	0.0335759	ENSG00000145431	PDGFC	K05450	NA	platelet derived growth factor C [Source:HGNC Symbol;Acc:HGNC:8801]	0.520935	0.152676	3.41204	1.77064	up
ko01521	EGFR tyrosine kinase inhibitor resistance	0.0335759	ENSG00000154229	PRKCA	NA	NA	protein kinase C alpha [Source:HGNC Symbol;Acc:HGNC:9393]	0.750535	0.34123	2.1995	1.13717	up
ko05224	Breast cancer	0.0403279	ENSG00000104290	FZD3	NA	NA	frizzled class receptor 3 [Source:HGNC Symbol;Acc:HGNC:4041]	0.372492	0.171425	2.17292	1.11964	up
ko05224	Breast cancer	0.0403279	ENSG00000138685	FGF2	K18497	NA	fibroblast growth factor 2 [Source:HGNC Symbol;Acc:HGNC:3676]	0.439874	0.19841	2.21699	1.1486	up
ko05224	Breast cancer	0.0403279	ENSG00000139618	BRCA2	NA	NA	BRCA2 DNA repair associated [Source:HGNC Symbol;Acc:HGNC:1101]	0.184376	0.0841413	2.19127	1.13176	up
ko05224	Breast cancer	0.0403279	ENSG00000174804	FZD4	K02354	NA	frizzled class receptor 4 [Source:HGNC Symbol;Acc:HGNC:4042]	0.453807	0.224919	2.01765	1.01267	up
ko04310	Wnt signaling pathway	0.0448961	ENSG00000104290	FZD3	NA	NA	frizzled class receptor 3 [Source:HGNC Symbol;Acc:HGNC:4041]	0.372492	0.171425	2.17292	1.11964	up
ko04310	Wnt signaling pathway	0.0448961	ENSG00000107984	DKK1	K02165	NA	dickkopf WNT signaling pathway inhibitor 1 [Source:HGNC Symbol;Acc:HGNC:2891]	28.6876	12.3954	2.31438	1.21062	up
ko04310	Wnt signaling pathway	0.0448961	ENSG00000154229	PRKCA	NA	NA	protein kinase C alpha [Source:HGNC Symbol;Acc:HGNC:9393]	0.750535	0.34123	2.1995	1.13717	up
ko04310	Wnt signaling pathway	0.0448961	ENSG00000174804	FZD4	K02354	NA	frizzled class receptor 4 [Source:HGNC Symbol;Acc:HGNC:4042]	0.453807	0.224919	2.01765	1.01267	up
ko04014	Ras signaling pathway	0.0486576	ENSG00000134954	ETS1	K02678	NA	ETS proto-oncogene 1, transcription factor [Source:HGNC Symbol;Acc:HGNC:3488]	0.661024	0.293537	2.25192	1.17116	up
ko04014	Ras signaling pathway	0.0486576	ENSG00000138685	FGF2	K18497	NA	fibroblast growth factor 2 [Source:HGNC Symbol;Acc:HGNC:3676]	0.439874	0.19841	2.21699	1.1486	up
ko04014	Ras signaling pathway	0.0486576	ENSG00000145431	PDGFC	K05450	NA	platelet derived growth factor C [Source:HGNC Symbol;Acc:HGNC:8801]	0.520935	0.152676	3.41204	1.77064	up
ko04014	Ras signaling pathway	0.0486576	ENSG00000154229	PRKCA	NA	NA	protein kinase C alpha [Source:HGNC Symbol;Acc:HGNC:9393]	0.750535	0.34123	2.1995	1.13717	up
ko04014	Ras signaling pathway	0.0486576	ENSG00000162924	REL	K09254	NA	REL proto-oncogene, NF-kB subunit [Source:HGNC Symbol;Acc:HGNC:9954]	0.215736	0.0885754	2.43562	1.28429	up
ko03440	Homologous recombination	0.0543685	ENSG00000083093	PALB2	K10897	NA	partner and localizer of BRCA2 [Source:HGNC Symbol;Acc:HGNC:26144]	0.911115	0.438942	2.07571	1.0536	up
ko03440	Homologous recombination	0.0543685	ENSG00000139618	BRCA2	NA	NA	BRCA2 DNA repair associated [Source:HGNC Symbol;Acc:HGNC:1101]	0.184376	0.0841413	2.19127	1.13176	up
ko04916	Melanogenesis	0.0551861	ENSG00000104290	FZD3	NA	NA	frizzled class receptor 3 [Source:HGNC Symbol;Acc:HGNC:4041]	0.372492	0.171425	2.17292	1.11964	up
ko04916	Melanogenesis	0.0551861	ENSG00000154229	PRKCA	NA	NA	protein kinase C alpha [Source:HGNC Symbol;Acc:HGNC:9393]	0.750535	0.34123	2.1995	1.13717	up
ko04916	Melanogenesis	0.0551861	ENSG00000174804	FZD4	K02354	NA	frizzled class receptor 4 [Source:HGNC Symbol;Acc:HGNC:4042]	0.453807	0.224919	2.01765	1.01267	up
ko05231	Choline metabolism in cancer	0.0551861	ENSG00000125772	GPCPD1	K18695	EC:3.1.4.2	glycerophosphocholine phosphodiesterase 1 [Source:HGNC Symbol;Acc:HGNC:26957]	0.692578	0.339643	2.03913	1.02796	up
ko05231	Choline metabolism in cancer	0.0551861	ENSG00000145431	PDGFC	K05450	NA	platelet derived growth factor C [Source:HGNC Symbol;Acc:HGNC:8801]	0.520935	0.152676	3.41204	1.77064	up
ko05231	Choline metabolism in cancer	0.0551861	ENSG00000154229	PRKCA	NA	NA	protein kinase C alpha [Source:HGNC Symbol;Acc:HGNC:9393]	0.750535	0.34123	2.1995	1.13717	up
ko04961	Endocrine and other factor-regulated calcium reabsorption	0.0567566	ENSG00000070371	CLTCL1	K04646	NA	clathrin heavy chain like 1 [Source:HGNC Symbol;Acc:HGNC:2093]	0.373407	0.177301	2.10606	1.07454	up
ko04961	Endocrine and other factor-regulated calcium reabsorption	0.0567566	ENSG00000154229	PRKCA	NA	NA	protein kinase C alpha [Source:HGNC Symbol;Acc:HGNC:9393]	0.750535	0.34123	2.1995	1.13717	up
ko00565	Ether lipid metabolism	0.059181	ENSG00000087253	LPCAT2	K13510	2.3.1.67;EC:2.3.1.23	lysophosphatidylcholine acyltransferase 2 [Source:HGNC Symbol;Acc:HGNC:26032]	0.681622	0.329547	2.06836	1.04849	up
ko00565	Ether lipid metabolism	0.059181	ENSG00000153982	GDPD1	K22387	EC:3.1.4.39	glycerophosphodiester phosphodiesterase domain containing 1 [Source:HGNC Symbol;Acc:HGNC:20883]	0.730993	0.220863	3.30972	1.72671	up
ko04928	Parathyroid hormone synthesis, secretion and action	0.0595522	ENSG00000019186	CYP24A1	K07436	EC:1.14.15.16	cytochrome P450 family 24 subfamily A member 1 [Source:HGNC Symbol;Acc:HGNC:2602]	6.27018	2.04677	3.06344	1.61515	up
ko04928	Parathyroid hormone synthesis, secretion and action	0.0595522	ENSG00000123104	ITPR2	K04959	NA	inositol 1,4,5-trisphosphate receptor type 2 [Source:HGNC Symbol;Acc:HGNC:6181]	0.26475	0.0944798	2.80219	1.48655	up
ko04928	Parathyroid hormone synthesis, secretion and action	0.0595522	ENSG00000154229	PRKCA	NA	NA	protein kinase C alpha [Source:HGNC Symbol;Acc:HGNC:9393]	0.750535	0.34123	2.1995	1.13717	up
ko04340	Hedgehog signaling pathway	0.0666637	ENSG00000074047	GLI2	K16798	NA	GLI family zinc finger 2 [Source:HGNC Symbol;Acc:HGNC:4318]	0.589243	0.277217	2.12556	1.08785	up
ko04340	Hedgehog signaling pathway	0.0666637	ENSG00000144857	BOC	K20020	NA	BOC cell adhesion associated, oncogene regulated [Source:HGNC Symbol;Acc:HGNC:17173]	0.248223	0.105773	2.34675	1.23066	up
ko00740	Riboflavin metabolism	0.0713663	ENSG00000197594	ENPP1	NA	NA	ectonucleotide pyrophosphatase/phosphodiesterase 1 [Source:HGNC Symbol;Acc:HGNC:3356]	0.386184	0.17715	2.17999	1.12432	up
ko04725	Cholinergic synapse	0.0735904	ENSG00000123104	ITPR2	K04959	NA	inositol 1,4,5-trisphosphate receptor type 2 [Source:HGNC Symbol;Acc:HGNC:6181]	0.26475	0.0944798	2.80219	1.48655	up
ko04725	Cholinergic synapse	0.0735904	ENSG00000154229	PRKCA	NA	NA	protein kinase C alpha [Source:HGNC Symbol;Acc:HGNC:9393]	0.750535	0.34123	2.1995	1.13717	up
ko04725	Cholinergic synapse	0.0735904	ENSG00000180720	CHRM4	NA	NA	cholinergic receptor muscarinic 4 [Source:HGNC Symbol;Acc:HGNC:1953]	3.04371	0.886079	3.43503	1.78032	up
ko03460	Fanconi anemia pathway	0.088013	ENSG00000083093	PALB2	K10897	NA	partner and localizer of BRCA2 [Source:HGNC Symbol;Acc:HGNC:26144]	0.911115	0.438942	2.07571	1.0536	up
ko03460	Fanconi anemia pathway	0.088013	ENSG00000139618	BRCA2	NA	NA	BRCA2 DNA repair associated [Source:HGNC Symbol;Acc:HGNC:1101]	0.184376	0.0841413	2.19127	1.13176	up
ko04730	Long-term depression	0.0964837	ENSG00000123104	ITPR2	K04959	NA	inositol 1,4,5-trisphosphate receptor type 2 [Source:HGNC Symbol;Acc:HGNC:6181]	0.26475	0.0944798	2.80219	1.48655	up
ko04730	Long-term depression	0.0964837	ENSG00000154229	PRKCA	NA	NA	protein kinase C alpha [Source:HGNC Symbol;Acc:HGNC:9393]	0.750535	0.34123	2.1995	1.13717	up
ko04720	Long-term potentiation	0.0993579	ENSG00000123104	ITPR2	K04959	NA	inositol 1,4,5-trisphosphate receptor type 2 [Source:HGNC Symbol;Acc:HGNC:6181]	0.26475	0.0944798	2.80219	1.48655	up
ko04720	Long-term potentiation	0.0993579	ENSG00000154229	PRKCA	NA	NA	protein kinase C alpha [Source:HGNC Symbol;Acc:HGNC:9393]	0.750535	0.34123	2.1995	1.13717	up
ko04015	Rap1 signaling pathway	0.104161	ENSG00000138685	FGF2	K18497	NA	fibroblast growth factor 2 [Source:HGNC Symbol;Acc:HGNC:3676]	0.439874	0.19841	2.21699	1.1486	up
ko04015	Rap1 signaling pathway	0.104161	ENSG00000145431	PDGFC	K05450	NA	platelet derived growth factor C [Source:HGNC Symbol;Acc:HGNC:8801]	0.520935	0.152676	3.41204	1.77064	up
ko04015	Rap1 signaling pathway	0.104161	ENSG00000154229	PRKCA	NA	NA	protein kinase C alpha [Source:HGNC Symbol;Acc:HGNC:9393]	0.750535	0.34123	2.1995	1.13717	up
ko04015	Rap1 signaling pathway	0.104161	ENSG00000198121	LPAR1	K04289	NA	lysophosphatidic acid receptor 1 [Source:HGNC Symbol;Acc:HGNC:3166]	0.688944	0.306452	2.24813	1.16873	up
ko04728	Dopaminergic synapse	0.105583	ENSG00000073711	PPP2R3A	NA	NA	protein phosphatase 2 regulatory subunit B''alpha [Source:HGNC Symbol;Acc:HGNC:9307]	0.341824	0.148662	2.29933	1.20122	up
ko04728	Dopaminergic synapse	0.105583	ENSG00000123104	ITPR2	K04959	NA	inositol 1,4,5-trisphosphate receptor type 2 [Source:HGNC Symbol;Acc:HGNC:6181]	0.26475	0.0944798	2.80219	1.48655	up
ko04728	Dopaminergic synapse	0.105583	ENSG00000154229	PRKCA	NA	NA	protein kinase C alpha [Source:HGNC Symbol;Acc:HGNC:9393]	0.750535	0.34123	2.1995	1.13717	up
ko04918	Thyroid hormone synthesis	0.114078	ENSG00000123104	ITPR2	K04959	NA	inositol 1,4,5-trisphosphate receptor type 2 [Source:HGNC Symbol;Acc:HGNC:6181]	0.26475	0.0944798	2.80219	1.48655	up
ko04918	Thyroid hormone synthesis	0.114078	ENSG00000154229	PRKCA	NA	NA	protein kinase C alpha [Source:HGNC Symbol;Acc:HGNC:9393]	0.750535	0.34123	2.1995	1.13717	up
ko04971	Gastric acid secretion	0.114078	ENSG00000123104	ITPR2	K04959	NA	inositol 1,4,5-trisphosphate receptor type 2 [Source:HGNC Symbol;Acc:HGNC:6181]	0.26475	0.0944798	2.80219	1.48655	up
ko04971	Gastric acid secretion	0.114078	ENSG00000154229	PRKCA	NA	NA	protein kinase C alpha [Source:HGNC Symbol;Acc:HGNC:9393]	0.750535	0.34123	2.1995	1.13717	up
ko04810	Regulation of actin cytoskeleton	0.114645	ENSG00000138685	FGF2	K18497	NA	fibroblast growth factor 2 [Source:HGNC Symbol;Acc:HGNC:3676]	0.439874	0.19841	2.21699	1.1486	up
ko04810	Regulation of actin cytoskeleton	0.114645	ENSG00000145431	PDGFC	K05450	NA	platelet derived growth factor C [Source:HGNC Symbol;Acc:HGNC:8801]	0.520935	0.152676	3.41204	1.77064	up
ko04810	Regulation of actin cytoskeleton	0.114645	ENSG00000180720	CHRM4	NA	NA	cholinergic receptor muscarinic 4 [Source:HGNC Symbol;Acc:HGNC:1953]	3.04371	0.886079	3.43503	1.78032	up
ko04810	Regulation of actin cytoskeleton	0.114645	ENSG00000198121	LPAR1	K04289	NA	lysophosphatidic acid receptor 1 [Source:HGNC Symbol;Acc:HGNC:3166]	0.688944	0.306452	2.24813	1.16873	up
ko04010	MAPK signaling pathway	0.115497	ENSG00000100784	RPS6KA5	NA	NA	ribosomal protein S6 kinase A5 [Source:HGNC Symbol;Acc:HGNC:10434]	0.0991835	0.0402504	2.46416	1.3011	up
ko04010	MAPK signaling pathway	0.115497	ENSG00000135090	TAOK3	K04429	EC:2.7.11.1	TAO kinase 3 [Source:HGNC Symbol;Acc:HGNC:18133]	0.368206	0.180223	2.04306	1.03073	up
ko04010	MAPK signaling pathway	0.115497	ENSG00000138685	FGF2	K18497	NA	fibroblast growth factor 2 [Source:HGNC Symbol;Acc:HGNC:3676]	0.439874	0.19841	2.21699	1.1486	up
ko04010	MAPK signaling pathway	0.115497	ENSG00000145431	PDGFC	K05450	NA	platelet derived growth factor C [Source:HGNC Symbol;Acc:HGNC:8801]	0.520935	0.152676	3.41204	1.77064	up
ko04010	MAPK signaling pathway	0.115497	ENSG00000154229	PRKCA	NA	NA	protein kinase C alpha [Source:HGNC Symbol;Acc:HGNC:9393]	0.750535	0.34123	2.1995	1.13717	up
ko04261	Adrenergic signaling in cardiomyocytes	0.117294	ENSG00000073711	PPP2R3A	NA	NA	protein phosphatase 2 regulatory subunit B''alpha [Source:HGNC Symbol;Acc:HGNC:9307]	0.341824	0.148662	2.29933	1.20122	up
ko04261	Adrenergic signaling in cardiomyocytes	0.117294	ENSG00000100784	RPS6KA5	NA	NA	ribosomal protein S6 kinase A5 [Source:HGNC Symbol;Acc:HGNC:10434]	0.0991835	0.0402504	2.46416	1.3011	up
ko04261	Adrenergic signaling in cardiomyocytes	0.117294	ENSG00000154229	PRKCA	NA	NA	protein kinase C alpha [Source:HGNC Symbol;Acc:HGNC:9393]	0.750535	0.34123	2.1995	1.13717	up
ko04910	Insulin signaling pathway	0.117294	ENSG00000110395	CBL	NA	NA	Cbl proto-oncogene [Source:HGNC Symbol;Acc:HGNC:1541]	0.536376	1.51059	0.355078	-1.49379	down
ko04910	Insulin signaling pathway	0.117294	ENSG00000132825	PPP1R3D	NA	NA	protein phosphatase 1 regulatory subunit 3D [Source:HGNC Symbol;Acc:HGNC:9294]	0.287962	0.688848	0.418034	-1.25831	down
ko04910	Insulin signaling pathway	0.117294	ENSG00000150907	FOXO1	NA	NA	forkhead box O1 [Source:HGNC Symbol;Acc:HGNC:3819]	0.928548	0.388822	2.38811	1.25587	up
ko00603	Glycosphingolipid biosynthesis - globo and isoglobo series	0.12158	ENSG00000169255	B3GALNT1	K00719	EC:2.4.1.79	beta-1,3-N-acetylgalactosaminyltransferase 1 (globoside blood group) [Source:HGNC Symbol;Acc:HGNC:918]	0.327459	0.15144	2.1623	1.11257	up
ko04550	Signaling pathways regulating pluripotency of stem cells	0.123327	ENSG00000104290	FZD3	NA	NA	frizzled class receptor 3 [Source:HGNC Symbol;Acc:HGNC:4041]	0.372492	0.171425	2.17292	1.11964	up
ko04550	Signaling pathways regulating pluripotency of stem cells	0.123327	ENSG00000138685	FGF2	K18497	NA	fibroblast growth factor 2 [Source:HGNC Symbol;Acc:HGNC:3676]	0.439874	0.19841	2.21699	1.1486	up
ko04550	Signaling pathways regulating pluripotency of stem cells	0.123327	ENSG00000174804	FZD4	K02354	NA	frizzled class receptor 4 [Source:HGNC Symbol;Acc:HGNC:4042]	0.453807	0.224919	2.01765	1.01267	up
ko05218	Melanoma	0.126234	ENSG00000138685	FGF2	K18497	NA	fibroblast growth factor 2 [Source:HGNC Symbol;Acc:HGNC:3676]	0.439874	0.19841	2.21699	1.1486	up
ko05218	Melanoma	0.126234	ENSG00000145431	PDGFC	K05450	NA	platelet derived growth factor C [Source:HGNC Symbol;Acc:HGNC:8801]	0.520935	0.152676	3.41204	1.77064	up
ko04072	Phospholipase D signaling pathway	0.133632	ENSG00000145431	PDGFC	K05450	NA	platelet derived growth factor C [Source:HGNC Symbol;Acc:HGNC:8801]	0.520935	0.152676	3.41204	1.77064	up
ko04072	Phospholipase D signaling pathway	0.133632	ENSG00000154229	PRKCA	NA	NA	protein kinase C alpha [Source:HGNC Symbol;Acc:HGNC:9393]	0.750535	0.34123	2.1995	1.13717	up
ko04072	Phospholipase D signaling pathway	0.133632	ENSG00000198121	LPAR1	K04289	NA	lysophosphatidic acid receptor 1 [Source:HGNC Symbol;Acc:HGNC:3166]	0.688944	0.306452	2.24813	1.16873	up
ko00360	Phenylalanine metabolism	0.137717	ENSG00000184254	ALDH1A3	NA	NA	aldehyde dehydrogenase 1 family member A3 [Source:HGNC Symbol;Acc:HGNC:409]	25.7195	11.4709	2.24215	1.16488	up
ko04970	Salivary secretion	0.138685	ENSG00000123104	ITPR2	K04959	NA	inositol 1,4,5-trisphosphate receptor type 2 [Source:HGNC Symbol;Acc:HGNC:6181]	0.26475	0.0944798	2.80219	1.48655	up
ko04970	Salivary secretion	0.138685	ENSG00000154229	PRKCA	NA	NA	protein kinase C alpha [Source:HGNC Symbol;Acc:HGNC:9393]	0.750535	0.34123	2.1995	1.13717	up
ko05226	Gastric cancer	0.139957	ENSG00000104290	FZD3	NA	NA	frizzled class receptor 3 [Source:HGNC Symbol;Acc:HGNC:4041]	0.372492	0.171425	2.17292	1.11964	up
ko05226	Gastric cancer	0.139957	ENSG00000138685	FGF2	K18497	NA	fibroblast growth factor 2 [Source:HGNC Symbol;Acc:HGNC:3676]	0.439874	0.19841	2.21699	1.1486	up
ko05226	Gastric cancer	0.139957	ENSG00000174804	FZD4	K02354	NA	frizzled class receptor 4 [Source:HGNC Symbol;Acc:HGNC:4042]	0.453807	0.224919	2.01765	1.01267	up
ko05100	Bacterial invasion of epithelial cells	0.14184	ENSG00000070371	CLTCL1	K04646	NA	clathrin heavy chain like 1 [Source:HGNC Symbol;Acc:HGNC:2093]	0.373407	0.177301	2.10606	1.07454	up
ko05100	Bacterial invasion of epithelial cells	0.14184	ENSG00000110395	CBL	NA	NA	Cbl proto-oncogene [Source:HGNC Symbol;Acc:HGNC:1541]	0.536376	1.51059	0.355078	-1.49379	down
ko00770	Pantothenate and CoA biosynthesis	0.145676	ENSG00000197594	ENPP1	NA	NA	ectonucleotide pyrophosphatase/phosphodiesterase 1 [Source:HGNC Symbol;Acc:HGNC:3356]	0.386184	0.17715	2.17999	1.12432	up
ko04934	Cushing syndrome	0.150721	ENSG00000104290	FZD3	NA	NA	frizzled class receptor 3 [Source:HGNC Symbol;Acc:HGNC:4041]	0.372492	0.171425	2.17292	1.11964	up
ko04934	Cushing syndrome	0.150721	ENSG00000123104	ITPR2	K04959	NA	inositol 1,4,5-trisphosphate receptor type 2 [Source:HGNC Symbol;Acc:HGNC:6181]	0.26475	0.0944798	2.80219	1.48655	up
ko04934	Cushing syndrome	0.150721	ENSG00000174804	FZD4	K02354	NA	frizzled class receptor 4 [Source:HGNC Symbol;Acc:HGNC:4042]	0.453807	0.224919	2.01765	1.01267	up
ko00450	Selenocompound metabolism	0.153562	ENSG00000109618	SEPSECS	K03341	EC:2.9.1.2	Sep (O-phosphoserine) tRNA:Sec (selenocysteine) tRNA synthase [Source:HGNC Symbol;Acc:HGNC:30605]	0.474299	0.214813	2.20797	1.14272	up
ko04150	mTOR signaling pathway	0.155101	ENSG00000104290	FZD3	NA	NA	frizzled class receptor 3 [Source:HGNC Symbol;Acc:HGNC:4041]	0.372492	0.171425	2.17292	1.11964	up
ko04150	mTOR signaling pathway	0.155101	ENSG00000154229	PRKCA	NA	NA	protein kinase C alpha [Source:HGNC Symbol;Acc:HGNC:9393]	0.750535	0.34123	2.1995	1.13717	up
ko04150	mTOR signaling pathway	0.155101	ENSG00000174804	FZD4	K02354	NA	frizzled class receptor 4 [Source:HGNC Symbol;Acc:HGNC:4042]	0.453807	0.224919	2.01765	1.01267	up
ko04972	Pancreatic secretion	0.157838	ENSG00000123104	ITPR2	K04959	NA	inositol 1,4,5-trisphosphate receptor type 2 [Source:HGNC Symbol;Acc:HGNC:6181]	0.26475	0.0944798	2.80219	1.48655	up
ko04972	Pancreatic secretion	0.157838	ENSG00000154229	PRKCA	NA	NA	protein kinase C alpha [Source:HGNC Symbol;Acc:HGNC:9393]	0.750535	0.34123	2.1995	1.13717	up
ko04218	Cellular senescence	0.159522	ENSG00000123104	ITPR2	K04959	NA	inositol 1,4,5-trisphosphate receptor type 2 [Source:HGNC Symbol;Acc:HGNC:6181]	0.26475	0.0944798	2.80219	1.48655	up
ko04218	Cellular senescence	0.159522	ENSG00000134954	ETS1	K02678	NA	ETS proto-oncogene 1, transcription factor [Source:HGNC Symbol;Acc:HGNC:3488]	0.661024	0.293537	2.25192	1.17116	up
ko04218	Cellular senescence	0.159522	ENSG00000150907	FOXO1	NA	NA	forkhead box O1 [Source:HGNC Symbol;Acc:HGNC:3819]	0.928548	0.388822	2.38811	1.25587	up
ko04390	Hippo signaling pathway	0.161747	ENSG00000074047	GLI2	K16798	NA	GLI family zinc finger 2 [Source:HGNC Symbol;Acc:HGNC:4318]	0.589243	0.277217	2.12556	1.08785	up
ko04390	Hippo signaling pathway	0.161747	ENSG00000104290	FZD3	NA	NA	frizzled class receptor 3 [Source:HGNC Symbol;Acc:HGNC:4041]	0.372492	0.171425	2.17292	1.11964	up
ko04390	Hippo signaling pathway	0.161747	ENSG00000174804	FZD4	K02354	NA	frizzled class receptor 4 [Source:HGNC Symbol;Acc:HGNC:4042]	0.453807	0.224919	2.01765	1.01267	up
ko04151	PI3K-Akt signaling pathway	0.16601	ENSG00000073711	PPP2R3A	NA	NA	protein phosphatase 2 regulatory subunit B''alpha [Source:HGNC Symbol;Acc:HGNC:9307]	0.341824	0.148662	2.29933	1.20122	up
ko04151	PI3K-Akt signaling pathway	0.16601	ENSG00000138685	FGF2	K18497	NA	fibroblast growth factor 2 [Source:HGNC Symbol;Acc:HGNC:3676]	0.439874	0.19841	2.21699	1.1486	up
ko04151	PI3K-Akt signaling pathway	0.16601	ENSG00000145431	PDGFC	K05450	NA	platelet derived growth factor C [Source:HGNC Symbol;Acc:HGNC:8801]	0.520935	0.152676	3.41204	1.77064	up
ko04151	PI3K-Akt signaling pathway	0.16601	ENSG00000154229	PRKCA	NA	NA	protein kinase C alpha [Source:HGNC Symbol;Acc:HGNC:9393]	0.750535	0.34123	2.1995	1.13717	up
ko04151	PI3K-Akt signaling pathway	0.16601	ENSG00000198121	LPAR1	K04289	NA	lysophosphatidic acid receptor 1 [Source:HGNC Symbol;Acc:HGNC:3166]	0.688944	0.306452	2.24813	1.16873	up
ko04012	ErbB signaling pathway	0.174161	ENSG00000110395	CBL	NA	NA	Cbl proto-oncogene [Source:HGNC Symbol;Acc:HGNC:1541]	0.536376	1.51059	0.355078	-1.49379	down
ko04012	ErbB signaling pathway	0.174161	ENSG00000154229	PRKCA	NA	NA	protein kinase C alpha [Source:HGNC Symbol;Acc:HGNC:9393]	0.750535	0.34123	2.1995	1.13717	up
ko00514	Other types of O-glycan biosynthesis	0.176794	ENSG00000163389	POGLUT1	K13667	EC:2.4.1.-	protein O-glucosyltransferase 1 [Source:HGNC Symbol;Acc:HGNC:22954]	0.414009	0.203887	2.03058	1.02189	up
ko04925	Aldosterone synthesis and secretion	0.184085	ENSG00000123104	ITPR2	K04959	NA	inositol 1,4,5-trisphosphate receptor type 2 [Source:HGNC Symbol;Acc:HGNC:6181]	0.26475	0.0944798	2.80219	1.48655	up
ko04925	Aldosterone synthesis and secretion	0.184085	ENSG00000154229	PRKCA	NA	NA	protein kinase C alpha [Source:HGNC Symbol;Acc:HGNC:9393]	0.750535	0.34123	2.1995	1.13717	up
ko05225	Hepatocellular carcinoma	0.186828	ENSG00000104290	FZD3	NA	NA	frizzled class receptor 3 [Source:HGNC Symbol;Acc:HGNC:4041]	0.372492	0.171425	2.17292	1.11964	up
ko05225	Hepatocellular carcinoma	0.186828	ENSG00000154229	PRKCA	NA	NA	protein kinase C alpha [Source:HGNC Symbol;Acc:HGNC:9393]	0.750535	0.34123	2.1995	1.13717	up
ko05225	Hepatocellular carcinoma	0.186828	ENSG00000174804	FZD4	K02354	NA	frizzled class receptor 4 [Source:HGNC Symbol;Acc:HGNC:4042]	0.453807	0.224919	2.01765	1.01267	up
ko04912	GnRH signaling pathway	0.190749	ENSG00000123104	ITPR2	K04959	NA	inositol 1,4,5-trisphosphate receptor type 2 [Source:HGNC Symbol;Acc:HGNC:6181]	0.26475	0.0944798	2.80219	1.48655	up
ko04912	GnRH signaling pathway	0.190749	ENSG00000154229	PRKCA	NA	NA	protein kinase C alpha [Source:HGNC Symbol;Acc:HGNC:9393]	0.750535	0.34123	2.1995	1.13717	up
ko04713	Circadian entrainment	0.194093	ENSG00000100784	RPS6KA5	NA	NA	ribosomal protein S6 kinase A5 [Source:HGNC Symbol;Acc:HGNC:10434]	0.0991835	0.0402504	2.46416	1.3011	up
ko04713	Circadian entrainment	0.194093	ENSG00000154229	PRKCA	NA	NA	protein kinase C alpha [Source:HGNC Symbol;Acc:HGNC:9393]	0.750535	0.34123	2.1995	1.13717	up
ko04922	Glucagon signaling pathway	0.200805	ENSG00000123104	ITPR2	K04959	NA	inositol 1,4,5-trisphosphate receptor type 2 [Source:HGNC Symbol;Acc:HGNC:6181]	0.26475	0.0944798	2.80219	1.48655	up
ko04922	Glucagon signaling pathway	0.200805	ENSG00000150907	FOXO1	NA	NA	forkhead box O1 [Source:HGNC Symbol;Acc:HGNC:3819]	0.928548	0.388822	2.38811	1.25587	up
ko00564	Glycerophospholipid metabolism	0.204172	ENSG00000087253	LPCAT2	K13510	2.3.1.67;EC:2.3.1.23	lysophosphatidylcholine acyltransferase 2 [Source:HGNC Symbol;Acc:HGNC:26032]	0.681622	0.329547	2.06836	1.04849	up
ko00564	Glycerophospholipid metabolism	0.204172	ENSG00000125772	GPCPD1	K18695	EC:3.1.4.2	glycerophosphocholine phosphodiesterase 1 [Source:HGNC Symbol;Acc:HGNC:26957]	0.692578	0.339643	2.03913	1.02796	up
ko04750	Inflammatory mediator regulation of TRP channels	0.204172	ENSG00000123104	ITPR2	K04959	NA	inositol 1,4,5-trisphosphate receptor type 2 [Source:HGNC Symbol;Acc:HGNC:6181]	0.26475	0.0944798	2.80219	1.48655	up
ko04750	Inflammatory mediator regulation of TRP channels	0.204172	ENSG00000154229	PRKCA	NA	NA	protein kinase C alpha [Source:HGNC Symbol;Acc:HGNC:9393]	0.750535	0.34123	2.1995	1.13717	up
ko05143	African trypanosomiasis	0.206798	ENSG00000154229	PRKCA	NA	NA	protein kinase C alpha [Source:HGNC Symbol;Acc:HGNC:9393]	0.750535	0.34123	2.1995	1.13717	up
ko04070	Phosphatidylinositol signaling system	0.21431	ENSG00000123104	ITPR2	K04959	NA	inositol 1,4,5-trisphosphate receptor type 2 [Source:HGNC Symbol;Acc:HGNC:6181]	0.26475	0.0944798	2.80219	1.48655	up
ko04070	Phosphatidylinositol signaling system	0.21431	ENSG00000154229	PRKCA	NA	NA	protein kinase C alpha [Source:HGNC Symbol;Acc:HGNC:9393]	0.750535	0.34123	2.1995	1.13717	up
ko05215	Prostate cancer	0.21431	ENSG00000145431	PDGFC	K05450	NA	platelet derived growth factor C [Source:HGNC Symbol;Acc:HGNC:8801]	0.520935	0.152676	3.41204	1.77064	up
ko05215	Prostate cancer	0.21431	ENSG00000150907	FOXO1	NA	NA	forkhead box O1 [Source:HGNC Symbol;Acc:HGNC:3819]	0.928548	0.388822	2.38811	1.25587	up
ko04360	Axon guidance	0.21769	ENSG00000104290	FZD3	NA	NA	frizzled class receptor 3 [Source:HGNC Symbol;Acc:HGNC:4041]	0.372492	0.171425	2.17292	1.11964	up
ko04360	Axon guidance	0.21769	ENSG00000144857	BOC	K20020	NA	BOC cell adhesion associated, oncogene regulated [Source:HGNC Symbol;Acc:HGNC:17173]	0.248223	0.105773	2.34675	1.23066	up
ko04360	Axon guidance	0.21769	ENSG00000154229	PRKCA	NA	NA	protein kinase C alpha [Source:HGNC Symbol;Acc:HGNC:9393]	0.750535	0.34123	2.1995	1.13717	up
ko04933	AGE-RAGE signaling pathway in diabetic complications	0.217702	ENSG00000150907	FOXO1	NA	NA	forkhead box O1 [Source:HGNC Symbol;Acc:HGNC:3819]	0.928548	0.388822	2.38811	1.25587	up
ko04933	AGE-RAGE signaling pathway in diabetic complications	0.217702	ENSG00000154229	PRKCA	NA	NA	protein kinase C alpha [Source:HGNC Symbol;Acc:HGNC:9393]	0.750535	0.34123	2.1995	1.13717	up
ko05202	Transcriptional misregulation in cancer	0.220109	ENSG00000058091	CDK14	K08821	EC:2.7.11.22	cyclin dependent kinase 14 [Source:HGNC Symbol;Acc:HGNC:8883]	0.381424	0.164869	2.3135	1.21008	up
ko05202	Transcriptional misregulation in cancer	0.220109	ENSG00000150907	FOXO1	NA	NA	forkhead box O1 [Source:HGNC Symbol;Acc:HGNC:3819]	0.928548	0.388822	2.38811	1.25587	up
ko05202	Transcriptional misregulation in cancer	0.220109	ENSG00000162924	REL	K09254	NA	REL proto-oncogene, NF-kB subunit [Source:HGNC Symbol;Acc:HGNC:9954]	0.215736	0.0885754	2.43562	1.28429	up
ko00410	beta-Alanine metabolism	0.221393	ENSG00000184254	ALDH1A3	NA	NA	aldehyde dehydrogenase 1 family member A3 [Source:HGNC Symbol;Acc:HGNC:409]	25.7195	11.4709	2.24215	1.16488	up
ko00601	Glycosphingolipid biosynthesis - lacto and neolacto series	0.221393	ENSG00000169255	B3GALNT1	K00719	EC:2.4.1.79	beta-1,3-N-acetylgalactosaminyltransferase 1 (globoside blood group) [Source:HGNC Symbol;Acc:HGNC:918]	0.327459	0.15144	2.1623	1.11257	up
ko00500	Starch and sucrose metabolism	0.221393	ENSG00000197594	ENPP1	NA	NA	ectonucleotide pyrophosphatase/phosphodiesterase 1 [Source:HGNC Symbol;Acc:HGNC:3356]	0.386184	0.17715	2.17999	1.12432	up
ko04726	Serotonergic synapse	0.224499	ENSG00000123104	ITPR2	K04959	NA	inositol 1,4,5-trisphosphate receptor type 2 [Source:HGNC Symbol;Acc:HGNC:6181]	0.26475	0.0944798	2.80219	1.48655	up
ko04726	Serotonergic synapse	0.224499	ENSG00000154229	PRKCA	NA	NA	protein kinase C alpha [Source:HGNC Symbol;Acc:HGNC:9393]	0.750535	0.34123	2.1995	1.13717	up
ko00760	Nicotinate and nicotinamide metabolism	0.228592	ENSG00000197594	ENPP1	NA	NA	ectonucleotide pyrophosphatase/phosphodiesterase 1 [Source:HGNC Symbol;Acc:HGNC:3356]	0.386184	0.17715	2.17999	1.12432	up
ko04931	Insulin resistance	0.234726	ENSG00000132825	PPP1R3D	NA	NA	protein phosphatase 1 regulatory subunit 3D [Source:HGNC Symbol;Acc:HGNC:9294]	0.287962	0.688848	0.418034	-1.25831	down
ko04931	Insulin resistance	0.234726	ENSG00000150907	FOXO1	NA	NA	forkhead box O1 [Source:HGNC Symbol;Acc:HGNC:3819]	0.928548	0.388822	2.38811	1.25587	up
ko04724	Glutamatergic synapse	0.248408	ENSG00000123104	ITPR2	K04959	NA	inositol 1,4,5-trisphosphate receptor type 2 [Source:HGNC Symbol;Acc:HGNC:6181]	0.26475	0.0944798	2.80219	1.48655	up
ko04724	Glutamatergic synapse	0.248408	ENSG00000154229	PRKCA	NA	NA	protein kinase C alpha [Source:HGNC Symbol;Acc:HGNC:9393]	0.750535	0.34123	2.1995	1.13717	up
ko04668	TNF signaling pathway	0.251834	ENSG00000078747	ITCH	K05632	EC:2.3.2.26	itchy E3 ubiquitin protein ligase [Source:HGNC Symbol;Acc:HGNC:13890]	1.44857	0.659968	2.19491	1.13416	up
ko04668	TNF signaling pathway	0.251834	ENSG00000100784	RPS6KA5	NA	NA	ribosomal protein S6 kinase A5 [Source:HGNC Symbol;Acc:HGNC:10434]	0.0991835	0.0402504	2.46416	1.3011	up
ko00350	Tyrosine metabolism	0.256736	ENSG00000184254	ALDH1A3	NA	NA	aldehyde dehydrogenase 1 family member A3 [Source:HGNC Symbol;Acc:HGNC:409]	25.7195	11.4709	2.24215	1.16488	up
ko04960	Aldosterone-regulated sodium reabsorption	0.256736	ENSG00000154229	PRKCA	NA	NA	protein kinase C alpha [Source:HGNC Symbol;Acc:HGNC:9393]	0.750535	0.34123	2.1995	1.13717	up
ko04919	Thyroid hormone signaling pathway	0.262121	ENSG00000150907	FOXO1	NA	NA	forkhead box O1 [Source:HGNC Symbol;Acc:HGNC:3819]	0.928548	0.388822	2.38811	1.25587	up
ko04919	Thyroid hormone signaling pathway	0.262121	ENSG00000154229	PRKCA	NA	NA	protein kinase C alpha [Source:HGNC Symbol;Acc:HGNC:9393]	0.750535	0.34123	2.1995	1.13717	up
ko03410	Base excision repair	0.263613	ENSG00000139372	TDG	K20813	EC:3.2.2.29	thymine DNA glycosylase [Source:HGNC Symbol;Acc:HGNC:11700]	1.56588	0.591347	2.64799	1.4049	up
ko04152	AMPK signaling pathway	0.275846	ENSG00000073711	PPP2R3A	NA	NA	protein phosphatase 2 regulatory subunit B''alpha [Source:HGNC Symbol;Acc:HGNC:9307]	0.341824	0.148662	2.29933	1.20122	up
ko04152	AMPK signaling pathway	0.275846	ENSG00000150907	FOXO1	NA	NA	forkhead box O1 [Source:HGNC Symbol;Acc:HGNC:3819]	0.928548	0.388822	2.38811	1.25587	up
ko04270	Vascular smooth muscle contraction	0.282706	ENSG00000123104	ITPR2	K04959	NA	inositol 1,4,5-trisphosphate receptor type 2 [Source:HGNC Symbol;Acc:HGNC:6181]	0.26475	0.0944798	2.80219	1.48655	up
ko04270	Vascular smooth muscle contraction	0.282706	ENSG00000154229	PRKCA	NA	NA	protein kinase C alpha [Source:HGNC Symbol;Acc:HGNC:9393]	0.750535	0.34123	2.1995	1.13717	up
ko03030	DNA replication	0.28387	ENSG00000138346	DNA2	K10742	EC:3.6.4.12	DNA replication helicase/nuclease 2 [Source:HGNC Symbol;Acc:HGNC:2939]	1.02875	0.50529	2.03596	1.02571	up
ko04071	Sphingolipid signaling pathway	0.286135	ENSG00000073711	PPP2R3A	NA	NA	protein phosphatase 2 regulatory subunit B''alpha [Source:HGNC Symbol;Acc:HGNC:9307]	0.341824	0.148662	2.29933	1.20122	up
ko04071	Sphingolipid signaling pathway	0.286135	ENSG00000154229	PRKCA	NA	NA	protein kinase C alpha [Source:HGNC Symbol;Acc:HGNC:9393]	0.750535	0.34123	2.1995	1.13717	up
ko04114	Oocyte meiosis	0.286135	ENSG00000123104	ITPR2	K04959	NA	inositol 1,4,5-trisphosphate receptor type 2 [Source:HGNC Symbol;Acc:HGNC:6181]	0.26475	0.0944798	2.80219	1.48655	up
ko04114	Oocyte meiosis	0.286135	ENSG00000204710	SPDYC	K08694	NA	speedy/RINGO cell cycle regulator family member C [Source:HGNC Symbol;Acc:HGNC:32681]	4.84898	2.1692	2.23538	1.16052	up
ko05165	Human papillomavirus infection	0.308596	ENSG00000073711	PPP2R3A	NA	NA	protein phosphatase 2 regulatory subunit B''alpha [Source:HGNC Symbol;Acc:HGNC:9307]	0.341824	0.148662	2.29933	1.20122	up
ko05165	Human papillomavirus infection	0.308596	ENSG00000104290	FZD3	NA	NA	frizzled class receptor 3 [Source:HGNC Symbol;Acc:HGNC:4041]	0.372492	0.171425	2.17292	1.11964	up
ko05165	Human papillomavirus infection	0.308596	ENSG00000150907	FOXO1	NA	NA	forkhead box O1 [Source:HGNC Symbol;Acc:HGNC:3819]	0.928548	0.388822	2.38811	1.25587	up
ko05165	Human papillomavirus infection	0.308596	ENSG00000174804	FZD4	K02354	NA	frizzled class receptor 4 [Source:HGNC Symbol;Acc:HGNC:4042]	0.453807	0.224919	2.01765	1.01267	up
ko05219	Bladder cancer	0.316421	ENSG00000100784	RPS6KA5	NA	NA	ribosomal protein S6 kinase A5 [Source:HGNC Symbol;Acc:HGNC:10434]	0.0991835	0.0402504	2.46416	1.3011	up
ko00982	Drug metabolism - cytochrome P450	0.322754	ENSG00000184254	ALDH1A3	NA	NA	aldehyde dehydrogenase 1 family member A3 [Source:HGNC Symbol;Acc:HGNC:409]	25.7195	11.4709	2.24215	1.16488	up
ko04979	Cholesterol metabolism	0.32903	ENSG00000057252	SOAT1	NA	NA	sterol O-acyltransferase 1 [Source:HGNC Symbol;Acc:HGNC:11177]	2.00934	0.926621	2.16845	1.11667	up
ko00970	Aminoacyl-tRNA biosynthesis	0.335248	ENSG00000109618	SEPSECS	K03341	EC:2.9.1.2	Sep (O-phosphoserine) tRNA:Sec (selenocysteine) tRNA synthase [Source:HGNC Symbol;Acc:HGNC:30605]	0.474299	0.214813	2.20797	1.14272	up
ko04723	Retrograde endocannabinoid signaling	0.337279	ENSG00000123104	ITPR2	K04959	NA	inositol 1,4,5-trisphosphate receptor type 2 [Source:HGNC Symbol;Acc:HGNC:6181]	0.26475	0.0944798	2.80219	1.48655	up
ko04723	Retrograde endocannabinoid signaling	0.337279	ENSG00000154229	PRKCA	NA	NA	protein kinase C alpha [Source:HGNC Symbol;Acc:HGNC:9393]	0.750535	0.34123	2.1995	1.13717	up
ko00600	Sphingolipid metabolism	0.347515	ENSG00000118276	B4GALT6	K07553	EC:2.4.1.274	beta-1,4-galactosyltransferase 6 [Source:HGNC Symbol;Acc:HGNC:929]	0.509815	0.224647	2.26941	1.18232	up
ko03420	Nucleotide excision repair	0.347515	ENSG00000270181	BIVM-ERCC5	K10846	NA	BIVM-ERCC5 readthrough [Source:HGNC Symbol;Acc:HGNC:43690]	0.741251	0.273366	2.71157	1.43913	up
ko00980	Metabolism of xenobiotics by cytochrome P450	0.353565	ENSG00000184254	ALDH1A3	NA	NA	aldehyde dehydrogenase 1 family member A3 [Source:HGNC Symbol;Acc:HGNC:409]	25.7195	11.4709	2.24215	1.16488	up
ko04120	Ubiquitin mediated proteolysis	0.354126	ENSG00000078747	ITCH	K05632	EC:2.3.2.26	itchy E3 ubiquitin protein ligase [Source:HGNC Symbol;Acc:HGNC:13890]	1.44857	0.659968	2.19491	1.13416	up
ko04120	Ubiquitin mediated proteolysis	0.354126	ENSG00000110395	CBL	NA	NA	Cbl proto-oncogene [Source:HGNC Symbol;Acc:HGNC:1541]	0.536376	1.51059	0.355078	-1.49379	down
ko00510	N-Glycan biosynthesis	0.35956	ENSG00000088035	ALG6	K03848	EC:2.4.1.267	ALG6 alpha-1,3-glucosyltransferase [Source:HGNC Symbol;Acc:HGNC:23157]	0.895664	0.429841	2.08371	1.05916	up
ko05110	Vibrio cholerae infection	0.35956	ENSG00000154229	PRKCA	NA	NA	protein kinase C alpha [Source:HGNC Symbol;Acc:HGNC:9393]	0.750535	0.34123	2.1995	1.13717	up
ko05168	Herpes simplex virus 1 infection	0.364623	ENSG00000130544	ZNF557	K09228	NA	zinc finger protein 557 [Source:HGNC Symbol;Acc:HGNC:28632]	0.229638	0.560856	0.409443	-1.28827	down
ko05168	Herpes simplex virus 1 infection	0.364623	ENSG00000160336	ZNF761	K09228	NA	zinc finger protein 761 [Source:HGNC Symbol;Acc:HGNC:23179]	0.554329	0.239071	2.31868	1.2133	up
ko05168	Herpes simplex virus 1 infection	0.364623	ENSG00000173875	ZNF791	K09228	NA	zinc finger protein 791 [Source:HGNC Symbol;Acc:HGNC:26895]	0.62196	0.267278	2.32702	1.21848	up
ko05168	Herpes simplex virus 1 infection	0.364623	ENSG00000181666	ZNF875	K09228	NA	zinc finger protein 875 [Source:HGNC Symbol;Acc:HGNC:4928]	0.190181	0.40997	0.463891	-1.10814	down
ko05168	Herpes simplex virus 1 infection	0.364623	ENSG00000196705	ZNF431	K09228	NA	zinc finger protein 431 [Source:HGNC Symbol;Acc:HGNC:20809]	0.175921	0.0835656	2.10518	1.07395	up
ko04921	Oxytocin signaling pathway	0.374152	ENSG00000123104	ITPR2	K04959	NA	inositol 1,4,5-trisphosphate receptor type 2 [Source:HGNC Symbol;Acc:HGNC:6181]	0.26475	0.0944798	2.80219	1.48655	up
ko04921	Oxytocin signaling pathway	0.374152	ENSG00000154229	PRKCA	NA	NA	protein kinase C alpha [Source:HGNC Symbol;Acc:HGNC:9393]	0.750535	0.34123	2.1995	1.13717	up
ko05204	Chemical carcinogenesis	0.377217	ENSG00000184254	ALDH1A3	NA	NA	aldehyde dehydrogenase 1 family member A3 [Source:HGNC Symbol;Acc:HGNC:409]	25.7195	11.4709	2.24215	1.16488	up
ko04622	RIG-I-like receptor signaling pathway	0.382996	ENSG00000101695	RNF125	K12170	EC:2.3.2.27	ring finger protein 125 [Source:HGNC Symbol;Acc:HGNC:21150]	0.519209	0.240754	2.15659	1.10875	up
ko00240	Pyrimidine metabolism	0.394396	ENSG00000197594	ENPP1	NA	NA	ectonucleotide pyrophosphatase/phosphodiesterase 1 [Source:HGNC Symbol;Acc:HGNC:3356]	0.386184	0.17715	2.17999	1.12432	up
ko05130	Pathogenic Escherichia coli infection	0.394396	ENSG00000154229	PRKCA	NA	NA	protein kinase C alpha [Source:HGNC Symbol;Acc:HGNC:9393]	0.750535	0.34123	2.1995	1.13717	up
ko04080	Neuroactive ligand-receptor interaction	0.398792	ENSG00000180720	CHRM4	NA	NA	cholinergic receptor muscarinic 4 [Source:HGNC Symbol;Acc:HGNC:1953]	3.04371	0.886079	3.43503	1.78032	up
ko04080	Neuroactive ligand-receptor interaction	0.398792	ENSG00000198121	LPAR1	K04289	NA	lysophosphatidic acid receptor 1 [Source:HGNC Symbol;Acc:HGNC:3166]	0.688944	0.306452	2.24813	1.16873	up
ko04080	Neuroactive ligand-receptor interaction	0.398792	ENSG00000244165	P2RY11	K08387	NA	purinergic receptor P2Y11 [Source:HGNC Symbol;Acc:HGNC:8540]	7.07029	3.22294	2.19374	1.13339	up
ko04927	Cortisol synthesis and secretion	0.411108	ENSG00000123104	ITPR2	K04959	NA	inositol 1,4,5-trisphosphate receptor type 2 [Source:HGNC Symbol;Acc:HGNC:6181]	0.26475	0.0944798	2.80219	1.48655	up
ko00010	Glycolysis / Gluconeogenesis	0.411108	ENSG00000184254	ALDH1A3	NA	NA	aldehyde dehydrogenase 1 family member A3 [Source:HGNC Symbol;Acc:HGNC:409]	25.7195	11.4709	2.24215	1.16488	up
ko04370	VEGF signaling pathway	0.411108	ENSG00000154229	PRKCA	NA	NA	protein kinase C alpha [Source:HGNC Symbol;Acc:HGNC:9393]	0.750535	0.34123	2.1995	1.13717	up
ko04924	Renin secretion	0.421997	ENSG00000123104	ITPR2	K04959	NA	inositol 1,4,5-trisphosphate receptor type 2 [Source:HGNC Symbol;Acc:HGNC:6181]	0.26475	0.0944798	2.80219	1.48655	up
ko04213	Longevity regulating pathway - multiple species	0.421997	ENSG00000150907	FOXO1	NA	NA	forkhead box O1 [Source:HGNC Symbol;Acc:HGNC:3819]	0.928548	0.388822	2.38811	1.25587	up
ko05031	Amphetamine addiction	0.427367	ENSG00000154229	PRKCA	NA	NA	protein kinase C alpha [Source:HGNC Symbol;Acc:HGNC:9393]	0.750535	0.34123	2.1995	1.13717	up
ko04664	Fc epsilon RI signaling pathway	0.432687	ENSG00000154229	PRKCA	NA	NA	protein kinase C alpha [Source:HGNC Symbol;Acc:HGNC:9393]	0.750535	0.34123	2.1995	1.13717	up
ko04020	Calcium signaling pathway	0.43899	ENSG00000123104	ITPR2	K04959	NA	inositol 1,4,5-trisphosphate receptor type 2 [Source:HGNC Symbol;Acc:HGNC:6181]	0.26475	0.0944798	2.80219	1.48655	up
ko04020	Calcium signaling pathway	0.43899	ENSG00000154229	PRKCA	NA	NA	protein kinase C alpha [Source:HGNC Symbol;Acc:HGNC:9393]	0.750535	0.34123	2.1995	1.13717	up
ko05230	Central carbon metabolism in cancer	0.443183	ENSG00000284194	SCO2	K07152	NA	synthesis of cytochrome C oxidase 2 [Source:HGNC Symbol;Acc:HGNC:10604]	17.4184	36.8174	0.473102	-1.07978	down
ko05223	Non-small cell lung cancer	0.453488	ENSG00000154229	PRKCA	NA	NA	protein kinase C alpha [Source:HGNC Symbol;Acc:HGNC:9393]	0.750535	0.34123	2.1995	1.13717	up
ko05167	Kaposi sarcoma-associated herpesvirus infection	0.454656	ENSG00000123104	ITPR2	K04959	NA	inositol 1,4,5-trisphosphate receptor type 2 [Source:HGNC Symbol;Acc:HGNC:6181]	0.26475	0.0944798	2.80219	1.48655	up
ko05167	Kaposi sarcoma-associated herpesvirus infection	0.454656	ENSG00000138685	FGF2	K18497	NA	fibroblast growth factor 2 [Source:HGNC Symbol;Acc:HGNC:3676]	0.439874	0.19841	2.21699	1.1486	up
ko05211	Renal cell carcinoma	0.468595	ENSG00000134954	ETS1	K02678	NA	ETS proto-oncogene 1, transcription factor [Source:HGNC Symbol;Acc:HGNC:3488]	0.661024	0.293537	2.25192	1.17116	up
ko04721	Synaptic vesicle cycle	0.473539	ENSG00000070371	CLTCL1	K04646	NA	clathrin heavy chain like 1 [Source:HGNC Symbol;Acc:HGNC:2093]	0.373407	0.177301	2.10606	1.07454	up
ko04520	Adherens junction	0.483291	ENSG00000136153	LMO7	K06084	NA	LIM domain 7 [Source:HGNC Symbol;Acc:HGNC:6646]	0.257567	0.111795	2.30392	1.20409	up
ko05214	Glioma	0.4881	ENSG00000154229	PRKCA	NA	NA	protein kinase C alpha [Source:HGNC Symbol;Acc:HGNC:9393]	0.750535	0.34123	2.1995	1.13717	up
ko04911	Insulin secretion	0.492865	ENSG00000154229	PRKCA	NA	NA	protein kinase C alpha [Source:HGNC Symbol;Acc:HGNC:9393]	0.750535	0.34123	2.1995	1.13717	up
ko04727	GABAergic synapse	0.502265	ENSG00000154229	PRKCA	NA	NA	protein kinase C alpha [Source:HGNC Symbol;Acc:HGNC:9393]	0.750535	0.34123	2.1995	1.13717	up
ko05212	Pancreatic cancer	0.502265	ENSG00000139618	BRCA2	NA	NA	BRCA2 DNA repair associated [Source:HGNC Symbol;Acc:HGNC:1101]	0.184376	0.0841413	2.19127	1.13176	up
ko05220	Chronic myeloid leukemia	0.5069	ENSG00000110395	CBL	NA	NA	Cbl proto-oncogene [Source:HGNC Symbol;Acc:HGNC:1541]	0.536376	1.51059	0.355078	-1.49379	down
ko05032	Morphine addiction	0.516044	ENSG00000154229	PRKCA	NA	NA	protein kinase C alpha [Source:HGNC Symbol;Acc:HGNC:9393]	0.750535	0.34123	2.1995	1.13717	up
ko04510	Focal adhesion	0.523437	ENSG00000145431	PDGFC	K05450	NA	platelet derived growth factor C [Source:HGNC Symbol;Acc:HGNC:8801]	0.520935	0.152676	3.41204	1.77064	up
ko04510	Focal adhesion	0.523437	ENSG00000154229	PRKCA	NA	NA	protein kinase C alpha [Source:HGNC Symbol;Acc:HGNC:9393]	0.750535	0.34123	2.1995	1.13717	up
ko05170	Human immunodeficiency virus 1 infection	0.529147	ENSG00000123104	ITPR2	K04959	NA	inositol 1,4,5-trisphosphate receptor type 2 [Source:HGNC Symbol;Acc:HGNC:6181]	0.26475	0.0944798	2.80219	1.48655	up
ko05170	Human immunodeficiency virus 1 infection	0.529147	ENSG00000154229	PRKCA	NA	NA	protein kinase C alpha [Source:HGNC Symbol;Acc:HGNC:9393]	0.750535	0.34123	2.1995	1.13717	up
ko05146	Amoebiasis	0.533834	ENSG00000154229	PRKCA	NA	NA	protein kinase C alpha [Source:HGNC Symbol;Acc:HGNC:9393]	0.750535	0.34123	2.1995	1.13717	up
ko03015	mRNA surveillance pathway	0.53818	ENSG00000073711	PPP2R3A	NA	NA	protein phosphatase 2 regulatory subunit B''alpha [Source:HGNC Symbol;Acc:HGNC:9307]	0.341824	0.148662	2.29933	1.20122	up
ko04211	Longevity regulating pathway	0.546753	ENSG00000150907	FOXO1	NA	NA	forkhead box O1 [Source:HGNC Symbol;Acc:HGNC:3819]	0.928548	0.388822	2.38811	1.25587	up
ko04666	Fc gamma R-mediated phagocytosis	0.546753	ENSG00000154229	PRKCA	NA	NA	protein kinase C alpha [Source:HGNC Symbol;Acc:HGNC:9393]	0.750535	0.34123	2.1995	1.13717	up
ko05163	Human cytomegalovirus infection	0.554281	ENSG00000123104	ITPR2	K04959	NA	inositol 1,4,5-trisphosphate receptor type 2 [Source:HGNC Symbol;Acc:HGNC:6181]	0.26475	0.0944798	2.80219	1.48655	up
ko05163	Human cytomegalovirus infection	0.554281	ENSG00000154229	PRKCA	NA	NA	protein kinase C alpha [Source:HGNC Symbol;Acc:HGNC:9393]	0.750535	0.34123	2.1995	1.13717	up
ko04350	TGF-beta signaling pathway	0.563432	ENSG00000049323	LTBP1	K19559	NA	latent transforming growth factor beta binding protein 1 [Source:HGNC Symbol;Acc:HGNC:6714]	0.859509	0.40008	2.14834	1.10322	up
ko04625	C-type lectin receptor signaling pathway	0.575543	ENSG00000123104	ITPR2	K04959	NA	inositol 1,4,5-trisphosphate receptor type 2 [Source:HGNC Symbol;Acc:HGNC:6181]	0.26475	0.0944798	2.80219	1.48655	up
ko04914	Progesterone-mediated oocyte maturation	0.575543	ENSG00000204710	SPDYC	K08694	NA	speedy/RINGO cell cycle regulator family member C [Source:HGNC Symbol;Acc:HGNC:32681]	4.84898	2.1692	2.23538	1.16052	up
ko04066	HIF-1 signaling pathway	0.579506	ENSG00000154229	PRKCA	NA	NA	protein kinase C alpha [Source:HGNC Symbol;Acc:HGNC:9393]	0.750535	0.34123	2.1995	1.13717	up
ko04650	Natural killer cell mediated cytotoxicity	0.587324	ENSG00000154229	PRKCA	NA	NA	protein kinase C alpha [Source:HGNC Symbol;Acc:HGNC:9393]	0.750535	0.34123	2.1995	1.13717	up
ko04670	Leukocyte transendothelial migration	0.61719	ENSG00000154229	PRKCA	NA	NA	protein kinase C alpha [Source:HGNC Symbol;Acc:HGNC:9393]	0.750535	0.34123	2.1995	1.13717	up
ko04722	Neurotrophin signaling pathway	0.664424	ENSG00000100784	RPS6KA5	NA	NA	ribosomal protein S6 kinase A5 [Source:HGNC Symbol;Acc:HGNC:10434]	0.0991835	0.0402504	2.46416	1.3011	up
ko04611	Platelet activation	0.667569	ENSG00000123104	ITPR2	K04959	NA	inositol 1,4,5-trisphosphate receptor type 2 [Source:HGNC Symbol;Acc:HGNC:6181]	0.26475	0.0944798	2.80219	1.48655	up
ko04142	Lysosome	0.682866	ENSG00000070371	CLTCL1	K04646	NA	clathrin heavy chain like 1 [Source:HGNC Symbol;Acc:HGNC:2093]	0.373407	0.177301	2.10606	1.07454	up
ko00230	Purine metabolism	0.685841	ENSG00000197594	ENPP1	NA	NA	ectonucleotide pyrophosphatase/phosphodiesterase 1 [Source:HGNC Symbol;Acc:HGNC:3356]	0.386184	0.17715	2.17999	1.12432	up
ko04926	Relaxin signaling pathway	0.688789	ENSG00000154229	PRKCA	NA	NA	protein kinase C alpha [Source:HGNC Symbol;Acc:HGNC:9393]	0.750535	0.34123	2.1995	1.13717	up
ko04915	Estrogen signaling pathway	0.688789	ENSG00000123104	ITPR2	K04959	NA	inositol 1,4,5-trisphosphate receptor type 2 [Source:HGNC Symbol;Acc:HGNC:6181]	0.26475	0.0944798	2.80219	1.48655	up
ko04140	Autophagy - animal	0.69171	ENSG00000198382	UVRAG	K21249	NA	UV radiation resistance associated [Source:HGNC Symbol;Acc:HGNC:12640]	0.480095	0.223995	2.14333	1.09985	up
ko04068	FoxO signaling pathway	0.69747	ENSG00000150907	FOXO1	NA	NA	forkhead box O1 [Source:HGNC Symbol;Acc:HGNC:3819]	0.928548	0.388822	2.38811	1.25587	up
ko04210	Apoptosis	0.705913	ENSG00000123104	ITPR2	K04959	NA	inositol 1,4,5-trisphosphate receptor type 2 [Source:HGNC Symbol;Acc:HGNC:6181]	0.26475	0.0944798	2.80219	1.48655	up
ko04371	Apelin signaling pathway	0.708676	ENSG00000123104	ITPR2	K04959	NA	inositol 1,4,5-trisphosphate receptor type 2 [Source:HGNC Symbol;Acc:HGNC:6181]	0.26475	0.0944798	2.80219	1.48655	up
ko04145	Phagosome	0.711413	ENSG00000102189	EEA1	K12478	NA	early endosome antigen 1 [Source:HGNC Symbol;Acc:HGNC:3185]	0.367502	0.110101	3.33786	1.73893	up
ko04932	Non-alcoholic fatty liver disease (NAFLD)	0.729875	ENSG00000078747	ITCH	K05632	EC:2.3.2.26	itchy E3 ubiquitin protein ligase [Source:HGNC Symbol;Acc:HGNC:13890]	1.44857	0.659968	2.19491	1.13416	up
ko04217	Necroptosis	0.734934	ENSG00000164695	CHMP4C	K12194	NA	charged multivesicular body protein 4C [Source:HGNC Symbol;Acc:HGNC:30599]	2.45697	1.13363	2.16734	1.11593	up
ko04621	NOD-like receptor signaling pathway	0.737428	ENSG00000123104	ITPR2	K04959	NA	inositol 1,4,5-trisphosphate receptor type 2 [Source:HGNC Symbol;Acc:HGNC:6181]	0.26475	0.0944798	2.80219	1.48655	up
ko05164	Influenza A	0.739899	ENSG00000154229	PRKCA	NA	NA	protein kinase C alpha [Source:HGNC Symbol;Acc:HGNC:9393]	0.750535	0.34123	2.1995	1.13717	up
ko05161	Hepatitis B	0.739899	ENSG00000154229	PRKCA	NA	NA	protein kinase C alpha [Source:HGNC Symbol;Acc:HGNC:9393]	0.750535	0.34123	2.1995	1.13717	up
ko05152	Tuberculosis	0.742347	ENSG00000102189	EEA1	K12478	NA	early endosome antigen 1 [Source:HGNC Symbol;Acc:HGNC:3185]	0.367502	0.110101	3.33786	1.73893	up
ko04022	cGMP-PKG signaling pathway	0.747175	ENSG00000123104	ITPR2	K04959	NA	inositol 1,4,5-trisphosphate receptor type 2 [Source:HGNC Symbol;Acc:HGNC:6181]	0.26475	0.0944798	2.80219	1.48655	up
ko04141	Protein processing in endoplasmic reticulum	0.774332	ENSG00000066427	ATXN3	K11863	EC:3.4.22.-	ataxin 3 [Source:HGNC Symbol;Acc:HGNC:7106]	0.277917	0.123567	2.24913	1.16937	up
ko05010	Alzheimer disease	0.784781	ENSG00000123104	ITPR2	K04959	NA	inositol 1,4,5-trisphosphate receptor type 2 [Source:HGNC Symbol;Acc:HGNC:6181]	0.26475	0.0944798	2.80219	1.48655	up
ko05016	Huntington disease	0.823708	ENSG00000070371	CLTCL1	K04646	NA	clathrin heavy chain like 1 [Source:HGNC Symbol;Acc:HGNC:2093]	0.373407	0.177301	2.10606	1.07454	up
ko05203	Viral carcinogenesis	0.831903	ENSG00000162924	REL	K09254	NA	REL proto-oncogene, NF-kB subunit [Source:HGNC Symbol;Acc:HGNC:9954]	0.215736	0.0885754	2.43562	1.28429	up
ko05166	Human T-cell leukemia virus 1 infection	0.857061	ENSG00000134954	ETS1	K02678	NA	ETS proto-oncogene 1, transcription factor [Source:HGNC Symbol;Acc:HGNC:3488]	0.661024	0.293537	2.25192	1.17116	up
